# Supplementary material for: A covalent organic polymer containing dative B ← N bonds: synthesis, single crystal structure, and physical properties
Source: Royal Society of Chemistry journal article supplement (doi:10.1039/d4qi02121e), 2024-01-01
Supplement: d4qi02121e1.pdf [file d4qi02121e1.pdf]

## Supporting Information

### **A Covalent Organic Polymer Containing Dative B←N Bonds: Synthesis, Single Crystal Structure, and Physical Properties**

Jinghang Wu,<sup>a</sup> Jiahe Liu,<sup>a</sup> Limei Rao,<sup>b</sup> Yunchen Long,<sup>a</sup> Qianfeng Gu,<sup>a</sup> Xin Wang,<sup>a</sup> Lei Zhang,<sup>a</sup> Fangyuan Kang,<sup>a</sup> Lang Jiang,<sup>\*b</sup> Dangyuan Lei<sup>\*a</sup> and Qichun Zhang<sup>\*ab</sup>

## Materials

All the reagents for the synthesis of **CityU-30** are indicated as follows: 9,10-di(4-pyridyl)anthracene (Zhengzhou Alfa Chemical Co., Ltd., 98%), 1,4-phenylenebisboronic acid (Shanghai Aladdin Biochemical Technology co., ltd., 98%), 1,2-dihydroxybenzene (Shanghai Aladdin Biochemical Technology co., ltd., 99%). These reagents were used directly without further purification. All solvents were purchased from Anaqua (Hong Kong) Company Limited and used as received without further purification.

## Characterization

The single crystal with suitable size was selected for structural characterization (CCDC number: 2363533). The data were collected on Rigaku XtaLAB PRO II Industrial X-ray diffractometer at 300K. Scanning electron microscope (SEM) was conducted on Thermo Fisher Quattro S Environmental SEM. X-ray photoelectron spectroscopy (XPS) analysis was conducted on a Thermo Fisher ESCALAB XI+ X-ray Photoelectron Spectrometer. Powder X-ray diffraction (PXRD) data were collected on Rigaku D2 PHASER XE-T X-ray Diffractometer System with Cu K $\alpha$  target ( $\lambda=1.54056$  Å). Fourier-transform infrared spectroscopy (FTIR) spectra were obtained on PerkinElmer Spectrum II. The thermal gravimetric analysis (TGA) of **CityU-30** was carried out on PerkinElmer Simultaneous. The UV-vis absorption data were measured by Hitachi UH4150 UV-VIS-NIR Spectrophotometer. Fluorescent spectroscopy was performed on Horiba FluoroMax-4. The absolute fluorescence quantum yield (PLQY) were measured using Edinburgh Instruments FLS1000 Photoluminescence Spectrometer System. The infrared (IR) images were taken on Fluke Ti480 PRO Infrared Camera.

**Table S1.** Crystal data and structure refinement of **CityU-30** (CCDC number: 2363533)

|                                                    | <b>CityU-30</b>                                  |
|----------------------------------------------------|--------------------------------------------------|
| <b>Empirical formula</b>                           | C <sub>21</sub> H <sub>14</sub> BNO <sub>2</sub> |
| <b>Formula weight</b>                              | 323.14                                           |
| <b>Crystal system</b>                              | triclinic                                        |
| <b>Space group</b>                                 | P-1                                              |
| <b><i>a</i> (Å)</b>                                | 6.41670(10)                                      |
| <b><i>b</i> (Å)</b>                                | 13.1842(4)                                       |
| <b><i>c</i> (Å)</b>                                | 13.6585(4)                                       |
| <b><i>α</i> (°)</b>                                | 116.729(3)                                       |
| <b><i>β</i> (°)</b>                                | 92.641(2)                                        |
| <b><i>γ</i> (°)</b>                                | 103.286(2)                                       |
| <b><i>V</i> (Å<sup>3</sup>)</b>                    | 989.45(5)                                        |
| <b><i>Z</i></b>                                    | 2                                                |
| <b><i>D</i><sub>calc</sub>(g·cm<sup>-3</sup>)</b>  | 1.085                                            |
| <b>Abs.coeff.(mm<sup>-1</sup>)</b>                 | 0.550                                            |
| <b>F(000)</b>                                      | 336.0                                            |
| <b>Reflns collected</b>                            | 8380                                             |
| <b>GO<sub>F</sub>on <i>F</i><sup>2</sup></b>       | 0.973                                            |
| <b><i>R</i><sub>int</sub></b>                      | 0.0411                                           |
| <b><i>R</i><sub>1</sub><sup>a</sup></b>            | 0.0435                                           |
| <b><i>wR</i><sub>2</sub>(all data)<sup>b</sup></b> | 0.1425                                           |

$$^a R_1 = \frac{\sum ||F_o| - |F_c||}{\sum |F_o|}, \quad ^b wR_2 = \frac{|\sum w (|F_o|^2 - |F_c|^2)|}{\sum |w(F_o^2)|^{1/2}}$$

**Table S2.** Selected bond distances (Å) of CityU-30

| Atom 1 | Atom 2          | Length/Å    |
|--------|-----------------|-------------|
| N1     | C12             | 1.3281 (19) |
| N1     | C10             | 1.339 (2)   |
| N1     | B1              | 1.690 (2)   |
| O1     | C5              | 1.3667(17)  |
| O1     | B1              | 1.4673(19)  |
| O2     | C6              | 1.3722(17)  |
| O2     | B1              | 1.4572(19)  |
| C1     | C2              | 1.377(3)    |
| C3     | C1              | 1.393(3)    |
| C4     | C2              | 1.392(3)    |
| C5     | C6              | 1.389(2)    |
| C5     | C3              | 1.370(2)    |
| C6     | C4              | 1.374(2)    |
| C8     | C9              | 1.375(2)    |
| C8     | B1              | 1.596(2)    |
| C8     | C7              | 1.376(2)    |
| C9     | C7 <sup>2</sup> | 1.386(2)    |
| C11    | C10             | 1.371(2)    |
| C12    | C13             | 1.381(2)    |
| C15    | C14             | 1.4957(19)  |
| C16    | C15             | 1.405(2)    |

<sup>1</sup>1-X,2-Y,1-Z; <sup>2</sup>2-X,1-Y,-Z

**Table S3.** Selected bond angles (°) of **CityU-30**

| <b>Atom 1</b> | <b>Atom 2</b> | <b>Atom 3</b> | <b>Angle/°</b> |
|---------------|---------------|---------------|----------------|
| C5            | O1            | B1            | 105.32(11)     |
| C12           | N1            | B1            | 123.25(12)     |
| C10           | N1            | B1            | 118.21(12)     |
| O1            | C5            | C6            | 110.50(12)     |
| O1            | C5            | C3            | 127.91(15)     |
| C3            | C5            | C6            | 121.58(14)     |
| C9            | C8            | B1            | 121.81(14)     |
| C9            | C8            | C7            | 115.80(14)     |
| N1            | C10           | C11           | 122.17(15)     |
| O1            | B1            | N1            | 105.26(11)     |
| O1            | B1            | C8            | 117.99(13)     |
| O2            | B1            | O1            | 106.89(11)     |

<sup>1</sup>1-X,2-Y,1-Z; <sup>2</sup>2-X,1-Y, -Z

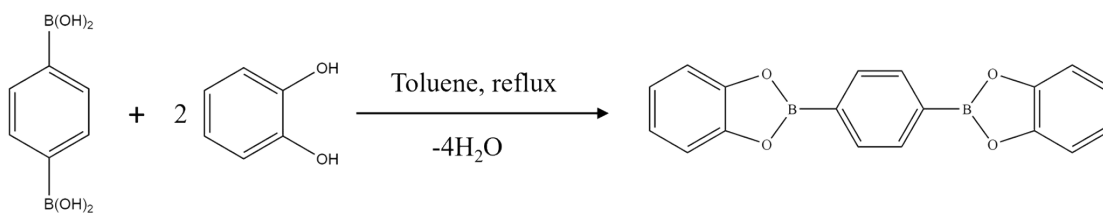

**Figure S1.** Synthesis of BACT.

Benzene-1,4-diboronic acid (0.5 g) and catechol (0.74 g) were added into 80 mL toluene. The mixture was heated under reflux overnight with a Dean–Stark apparatus device for 48h. After reaction, the solvent was removed by solvent evaporation under reduced pressure. The obtained white needle-like crystals were further dried in vacuum at 120 °C for 12 h. Yield: 95%.

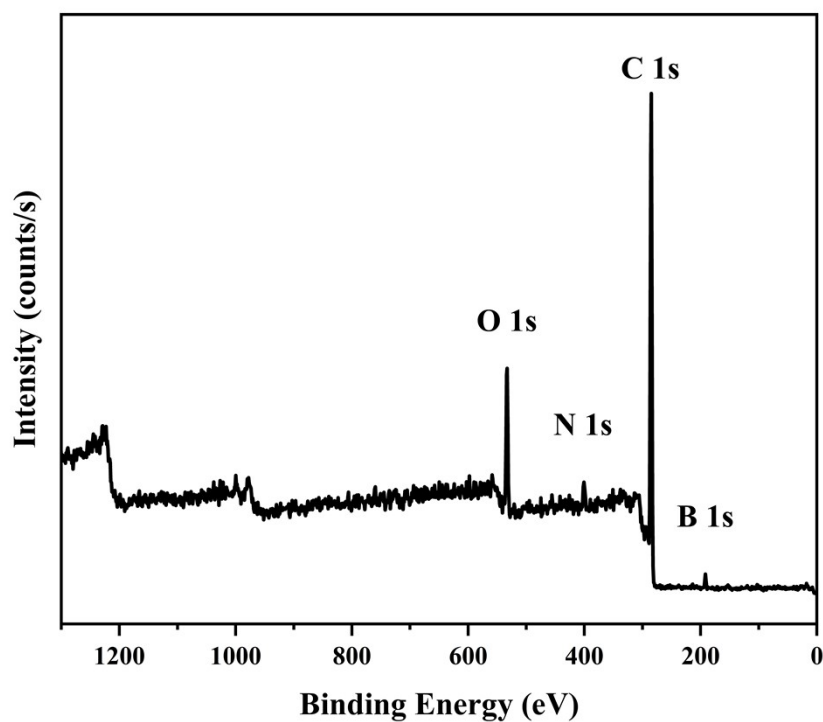

**Figure S2.** XPS survey of CityU-30.

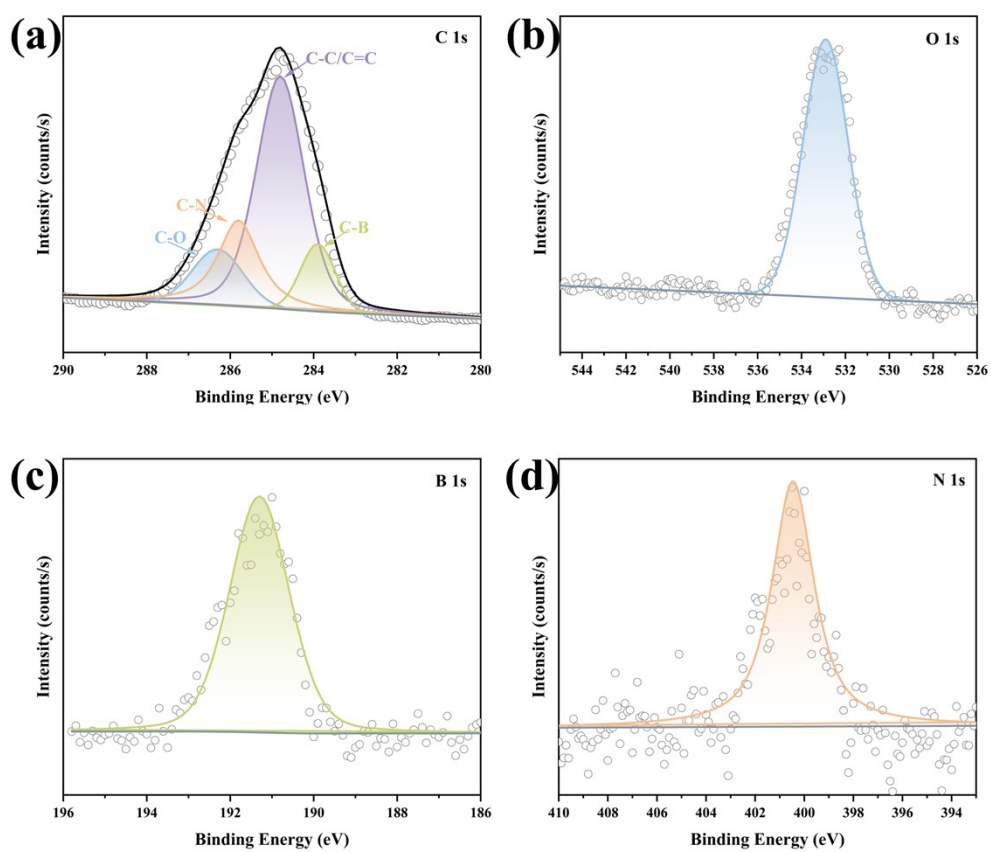

**Figure S3.** XPS spectra of CityU-30 on (a) C 1s, (b) O 1s, (c) B 1s, and (d) C 1s.

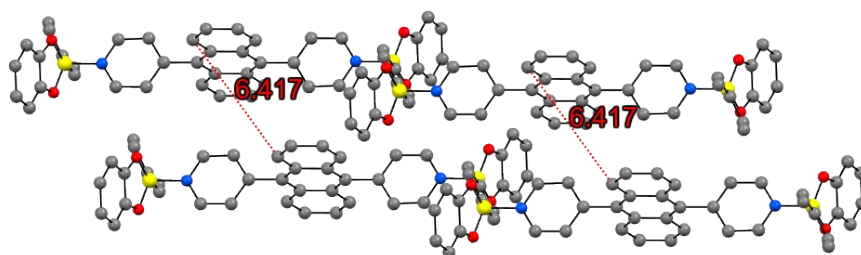

**Figure S4.** Distance between chains of CityU-30 (Unit: Å).

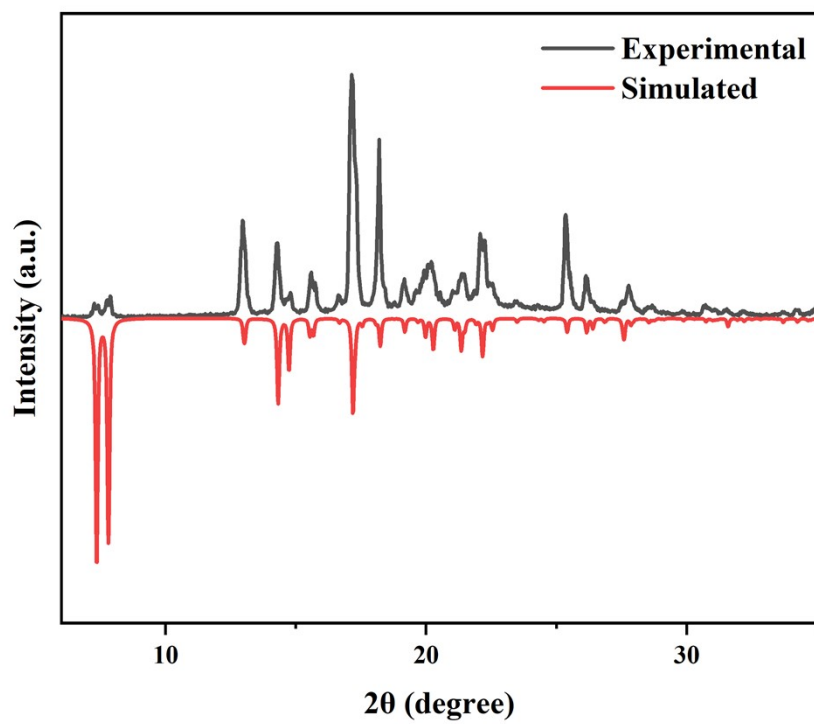

**Figure S5.** Experimental and simulated PXR D patterns of CityU-30.



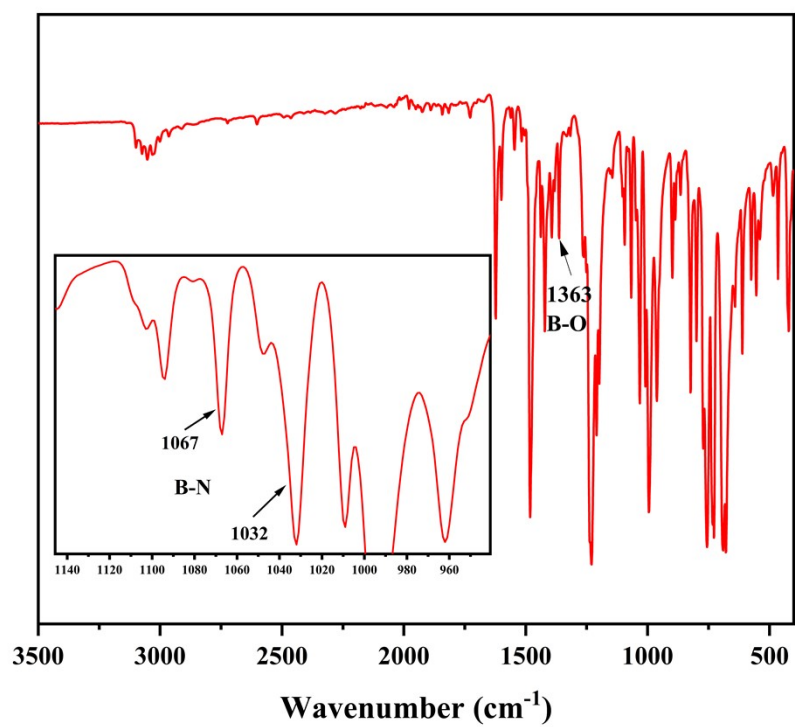

Figure S6. FTIR spectrum of CityU-30.

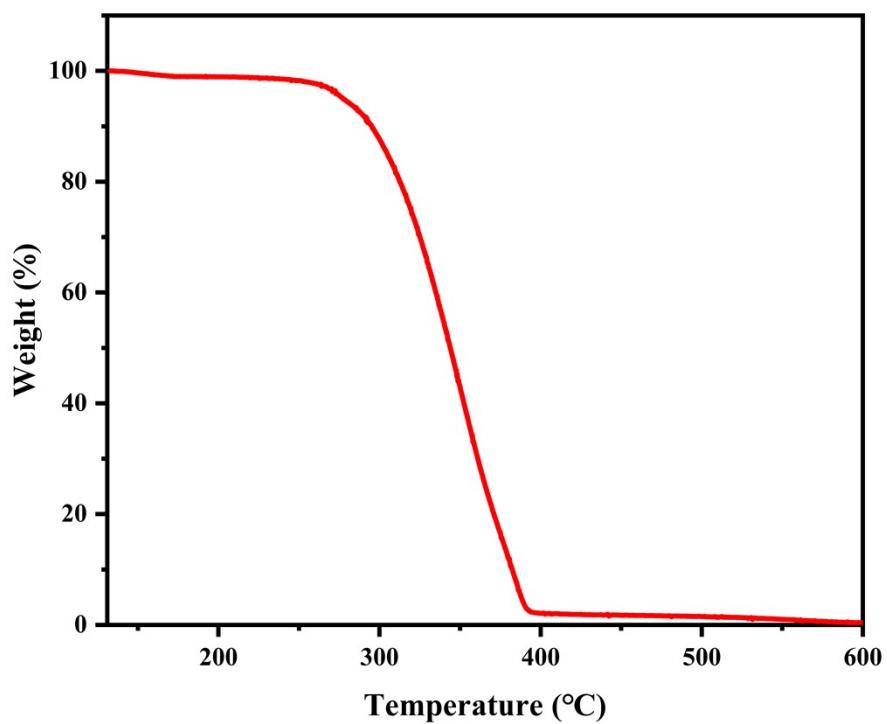

Figure S7. TGA curve of CityU-30

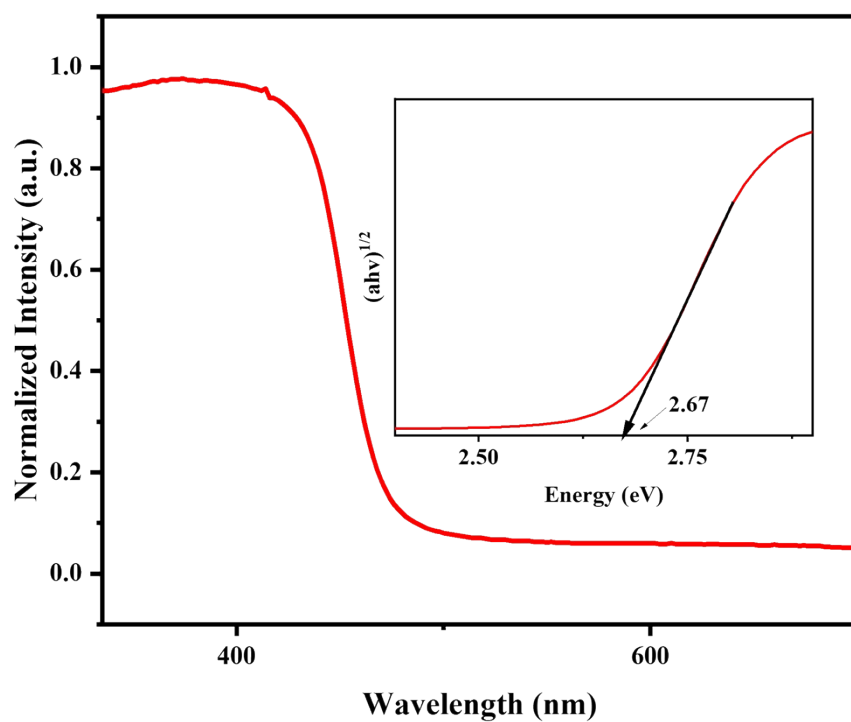

**Figure S8.** UV-vis spectrum of CityU-30. The inset is the curve obtained by Tauc-plot method.

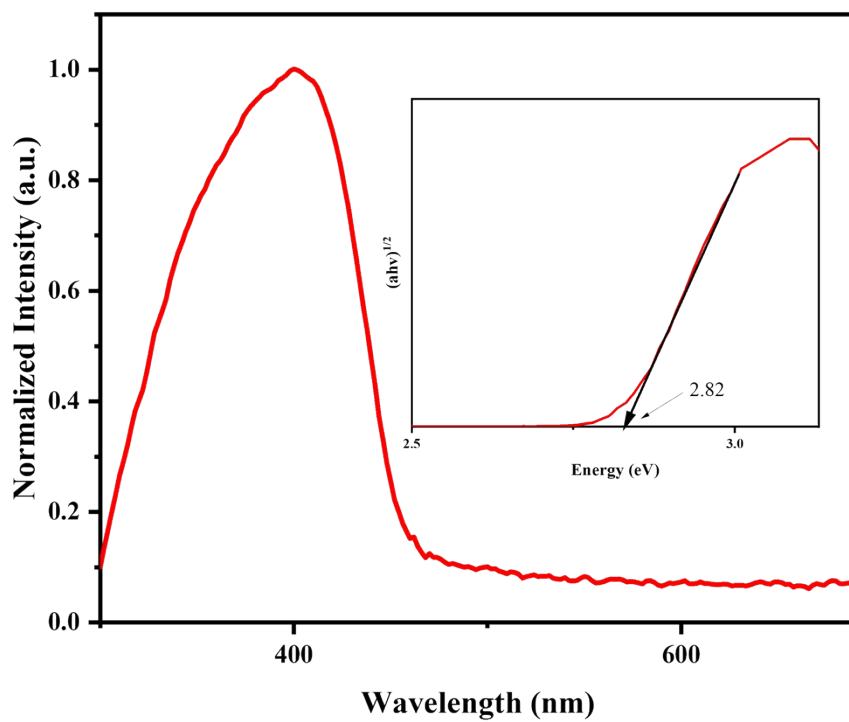

**Figure S9.** UV-vis spectra of DPA. The inset is the curve obtained by Tauc-plot method.

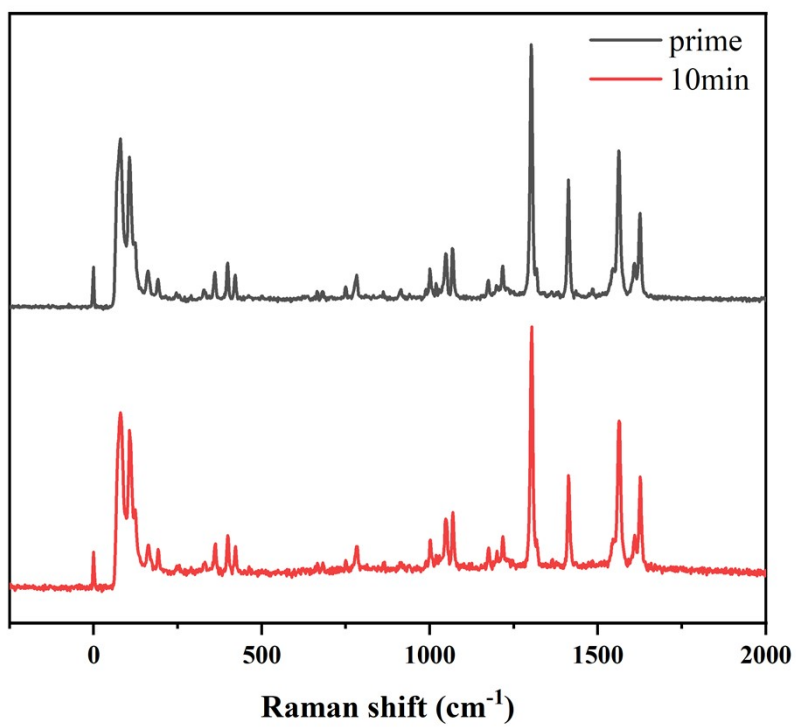

**Figure S10.** Raman spectra of **CityU-30** before excitation at 396 nm and after 10min of excitation.
